# Supplementary material for: Fabrication of nanofiber stationary phases from chopped polyacrylonitrile co-polymer microfibers for use in ultrathin layer chromatography of amino acids
Source: Royal Society of Chemistry journal article supplement (doi:10.1039/c6ra15465d), 2016-01-01
Supplement: c6ra15465d1.pdf [file c6ra15465d1.pdf]

Table S1. Effect of PAN concentration on  $hR_F$  values, spot width (w) plate number (N) and plate height (H) of amino acids using mobile phase  $M_8$ .

| Amino acids        | Concentration of PAN (%) |     |     |      |                 |     |     |      |                 |     |     |      |
|--------------------|--------------------------|-----|-----|------|-----------------|-----|-----|------|-----------------|-----|-----|------|
|                    | 8                        |     |     |      | 10              |     |     |      | 12              |     |     |      |
|                    | (100-300)**              |     |     |      | (180-200)**     |     |     |      | (450-670)**     |     |     |      |
|                    | $hR_F$                   | w   | N   | H    | $hR_F$          | w   | N   | H    | $hR_F$          | w   | N   | H    |
| Ala                | 47 <sub>T</sub> *        | 14  | 7   | 2710 | 50 <sub>T</sub> | 11  | 9   | 1850 | 58 <sub>T</sub> | 17  | 7   | 2732 |
| Gly                | 50 <sub>T</sub>          | 8.0 | 23  | 888  | 58 <sub>T</sub> | 15  | 8   | 2322 | 55 <sub>T</sub> | 16  | 8   | 2645 |
|                    | 83                       | 3.3 | 435 | 48   |                 |     |     |      |                 |     |     |      |
| Ile                | 73 <sub>T</sub>          | 11  | 28  | 719  | 53 <sub>T</sub> | 10  | 13  | 1314 | 75 <sub>T</sub> | 10  | 36  | 556  |
| Leu                | 75 <sub>T</sub>          | 10  | 37  | 566  | 59 <sub>T</sub> | 10  | 16  | 1063 | 73 <sub>T</sub> | 11  | 28  | 719  |
| Val                | 40 <sub>T</sub>          | 16  | 4   | 3125 | 65 <sub>T</sub> | 6.5 | 54  | 349  | 70 <sub>T</sub> | 10  | 31  | 638  |
| Phe                | 74 <sub>T</sub>          | 7.0 | 72  | 279  | 88              | 3.3 | 340 | 54   | 88              | 5.0 | 196 | 102  |
| Try                | 70 <sub>T</sub>          | 6.5 | 80  | 268  | 81              | 4.0 | 210 | 86   | 85 <sub>T</sub> | 6.0 | 128 | 156  |
| Tyr                | 48 <sub>T</sub>          | 9.0 | 18  | 1122 | 58              | 3.0 | 235 | 85   | 83 <sub>T</sub> | 7.0 | 89  | 225  |
| Asp                | 90                       | 4.0 | 363 | 65   | 86              | 3.0 | 427 | 421  | 50 <sub>T</sub> | 20  | 4   | 5000 |
| Glu                | 50 <sub>T</sub>          | 20  | 4   | 6000 | 50 <sub>T</sub> | 20  | 4   | 5000 | 50 <sub>T</sub> | 20  | 4   | 5000 |
| Arg                | 85 <sub>T</sub>          | 6.0 | 138 | 161  | 47 <sub>T</sub> | 5.0 | 54  | 434  | 83 <sub>T</sub> | 7.0 | 89  | 225  |
| His                | 89                       | 4.5 | 260 | 82   | 90              | 2.5 | 726 | 29   | 90              | 4.0 | 363 | 65   |
| Lys                | 73                       | 5.0 | 135 | 149  | 87              | 4.7 | 188 | 94   | 88              | 6.0 | 128 | 156  |
| Ser                | 78 <sub>T</sub>          | 8.0 | 64  | 330  | 68 <sub>T</sub> | 7.0 | 60  | 336  | 83 <sub>T</sub> | 7.0 | 89  | 225  |
| Thr                | 75 <sub>T</sub>          | 5.3 | 129 | 160  | 65 <sub>T</sub> | 8.0 | 42  | 473  | 50 <sub>T</sub> | 20  | 4   | 5000 |
| Met                | 70 <sub>T</sub>          | 8.0 | 49  | 408  | 78 <sub>T</sub> | 6.5 | 85  | 227  | 81 <sub>T</sub> | 6.3 | 105 | 192  |
| Cys                | 58                       | 5.8 | 72  | 479  | 68              | 5.0 | 117 | 172  | 78 <sub>T</sub> | 5.8 | 116 | 176  |
| (Cys) <sub>2</sub> | 58                       | 5.6 | 50  | 308  | 65              | 6.0 | 75  | 266  | 73 <sub>T</sub> | 9.0 | 42  | 482  |
| Asn                | 78                       | 4.0 | 240 | 83   | 80              | 4.0 | 256 | 78   | 80              | 5.0 | 164 | 122  |
| Gln                | 63                       | 5.8 | 71  | 339  | 68 <sub>T</sub> | 6.0 | 81  | 247  | 79 <sub>T</sub> | 6.0 | 100 | 200  |

Each value is an average of four replicates; \*T = Tailed spot; \*\*denotes fiber diameter in nm; the values of w in mm and H in  $\mu$ m.

Table S2. Effect of flow rate on  $hR_F$  values, spot width (w), plate number (N) and plate height (H) of amino acids using mobile phase M<sub>8</sub>.

| Amino acids        | Flow rate (mLh <sup>-1</sup> ) |      |     |      |                    |     |     |      |                    |      |     |      |
|--------------------|--------------------------------|------|-----|------|--------------------|-----|-----|------|--------------------|------|-----|------|
|                    | 0.2<br>(180-200)**             |      |     |      | 0.5<br>(255-380)** |     |     |      | 1.0<br>(240-425)** |      |     |      |
|                    | $hR_F$                         | w    | N   | H    | $hR_F$             | w   | N   | H    | $hR_F$             | w    | N   | H    |
| Ala                | 50 <sub>T</sub> *              | 11.0 | 9   | 1850 | 75 <sub>T</sub>    | 6.0 | 100 | 200  | 70 <sub>T</sub>    | 6.3  | 80  | 259  |
| Gly                | 58 <sub>T</sub>                | 15.0 | 8   | 2322 | 23                 | 3.0 | 38  | 607  | 63 <sub>T</sub>    | 14.5 | 12  | 1689 |
|                    |                                |      |     |      | 75                 | 4.0 | 226 | 90   |                    |      |     |      |
| Ile                | 53 <sub>T</sub>                | 10.0 | 13  | 1314 | 83 <sub>T</sub>    | 6.8 | 100 | 225  | 74 <sub>T</sub>    | 5.7  | 111 | 184  |
| Leu                | 59 <sub>T</sub>                | 10.0 | 16  | 1063 | 88                 | 3.8 | 349 | 60   | 83 <sub>T</sub>    | 6.5  | 106 | 194  |
| Val                | 65 <sub>T</sub>                | 6.5  | 54  | 349  | 80                 | 4.0 | 256 | 78   | 85 <sub>T</sub>    | 6.0  | 138 | 161  |
| Phe                | 88                             | 3.3  | 340 | 54   | 85 <sub>T</sub>    | 6.0 | 128 | 156  | 78 <sub>T</sub>    | 8.8  | 51  | 355  |
| Try                | 81                             | 4.0  | 210 | 86   | 88                 | 5.0 | 196 | 102  | 73 <sub>T</sub>    | 8.4  | 48  | 428  |
| Tyr                | 58                             | 3.0  | 235 | 85   | 75 <sub>T</sub>    | 6.0 | 100 | 200  | 73 <sub>T</sub>    | 7.8  | 57  | 364  |
| Asp                | 86                             | 3.0  | 427 | 421  | 13                 | 3.3 | 12  | 2321 | 85 <sub>T</sub>    | 6.0  | 138 | 161  |
|                    |                                |      |     |      | 88                 | 3.0 | 546 | 37   |                    |      |     |      |
| Glu                | 50 <sub>T</sub>                | 20.0 | 4   | 5000 | 88                 | 5.0 | 196 | 102  | 75 <sub>T</sub>    | 9.3  | 45  | 588  |
| Arg                | 47 <sub>T</sub>                | 5.0  | 54  | 434  | 85                 | 5.3 | 166 | 124  | 75 <sub>T</sub>    | 8.7  | 50  | 423  |
| His                | 90                             | 2.5  | 726 | 29   | 88                 | 5.0 | 227 | 98   | 89                 | 3.3  | 486 | 45   |
| Lys                | 87                             | 4.7  | 188 | 94   | 85 <sub>T</sub>    | 6.0 | 133 | 158  | 83 <sub>T</sub>    | 7.0  | 94  | 231  |
| Ser                | 68 <sub>T</sub>                | 7.0  | 60  | 336  | 85 <sub>T</sub>    | 6.0 | 138 | 161  | 83 <sub>T</sub>    | 6.8  | 102 | 223  |
| Thr                | 65 <sub>T</sub>                | 8.0  | 42  | 473  | 85 <sub>T</sub>    | 6.0 | 135 | 160  | 85 <sub>T</sub>    | 6.0  | 138 | 161  |
| Met                | 78 <sub>T</sub>                | 6.5  | 85  | 227  | 85 <sub>T</sub>    | 6.0 | 135 | 160  | 85 <sub>T</sub>    | 6.0  | 135 | 160  |
| Cys                | 68                             | 5.0  | 117 | 172  | 89                 | 4.5 | 260 | 82   | 88                 | 4.5  | 254 | 83   |
| (Cys) <sub>2</sub> | 65                             | 6.0  | 75  | 266  | 76 <sub>T</sub>    | 7.0 | 78  | 270  | 61                 | 5.0  | 95  | 212  |
| Asn                | 80                             | 4.0  | 256 | 78   | 88                 | 4.8 | 227 | 98   | 86                 | 4.8  | 218 | 101  |
| Gln                | 68 <sub>T</sub>                | 6.0  | 81  | 2467 | 85 <sub>T</sub>    | 6.0 | 138 | 161  | 68 <sub>T</sub>    | 6.3  | 74  | 275  |

Each value is an average of four replicates. \*T = Tailed spot; \*\*indicates fiber diameter in nm; the values of w in nm and H in  $\mu$ m.

Table S3. Effect of decrease in spinning time on  $hR_F$  values of amino acids using mobile phase  $M_8$ .

| Amino acids        | $hR_F$ value      |                 |                 |                 |                 |                 |
|--------------------|-------------------|-----------------|-----------------|-----------------|-----------------|-----------------|
|                    | Spinning time (h) |                 |                 |                 |                 |                 |
|                    | 10                | 8               | 6               | 4               | 2               | 1               |
| Ala                | 50 <sub>T*</sub>  | 48 <sub>T</sub> | 75 <sub>T</sub> | 78 <sub>T</sub> | 74 <sub>T</sub> | 73 <sub>T</sub> |
| Gly                | 58 <sub>T</sub>   | 55 <sub>T</sub> | 50 <sub>T</sub> | 63 <sub>T</sub> | 54 <sub>T</sub> | 55 <sub>T</sub> |
| Ile                | 53 <sub>T</sub>   | 58 <sub>T</sub> | 73 <sub>T</sub> | 75 <sub>T</sub> | 60 <sub>T</sub> | 70 <sub>T</sub> |
| Leu                | 59 <sub>T</sub>   | 50 <sub>T</sub> | 70 <sub>T</sub> | 75 <sub>T</sub> | 63 <sub>T</sub> | 73 <sub>T</sub> |
| Val                | 65 <sub>T</sub>   | 73              | 68 <sub>T</sub> | 70 <sub>T</sub> | 40 <sub>T</sub> | 53              |
| Phe                | 88                | 85              | 90              | 85              | 90              | 70 <sub>T</sub> |
| Try                | 81                | 60              | 88              | 63              | 60              | 60              |
| Tyr                | 58                | 60              | 65              | 58              | 53              | 48              |
| Asp                | 86                | 93              | 90              | 88              | 71 <sub>T</sub> | 66 <sub>T</sub> |
| Glu                | 50 <sub>T</sub>   | 60 <sub>T</sub> | 92              | 55 <sub>T</sub> | 56 <sub>T</sub> | 63 <sub>T</sub> |
| Arg                | 47 <sub>T</sub>   | 54              | 88              | 75              | 63 <sub>T</sub> | 75 <sub>T</sub> |
| His                | 90                | 67              | 90              | 85              | 75 <sub>T</sub> | 78 <sub>T</sub> |
| Lys                | 87                | 80 <sub>T</sub> | 83 <sub>T</sub> | 93              | 65              | 70 <sub>T</sub> |
| Ser                | 68 <sub>T</sub>   | 68 <sub>T</sub> | 90              | 88              | 58 <sub>T</sub> | 78              |
| Thr                | 65 <sub>T</sub>   | 63 <sub>T</sub> | 88              | 83              | 48 <sub>T</sub> | 65 <sub>T</sub> |
| Met                | 78 <sub>T</sub>   | 83              | 84              | 83              | 61 <sub>T</sub> | 70 <sub>T</sub> |
| Cys                | 68                | 75              | 90              | 88              | 66 <sub>T</sub> | 78 <sub>T</sub> |
| (Cys) <sub>2</sub> | 65                | 68 <sub>T</sub> | 75 <sub>T</sub> | 75 <sub>T</sub> | 73 <sub>T</sub> | 80 <sub>T</sub> |
| Asn                | 80                | 85              | 93              | 90              | 53 <sub>T</sub> | 76              |
| Gln                | 68 <sub>T</sub>   | 73              | 60 <sub>T</sub> | 60 <sub>T</sub> | 45 <sub>T</sub> | 70 <sub>T</sub> |

Each value is an average of four replicates. \*T = Tailed spot.

Table S4. Effect of analyte concentration on  $hR_F$  values of amino acids using mobile phase  $M_8$ .

| Amino acids        | Concentrations (%) |                 |
|--------------------|--------------------|-----------------|
|                    | 0.5                | 1.0             |
| Ala                | 74                 | 73 <sub>T</sub> |
| Gly                | 55 <sub>T*</sub>   | 55 <sub>T</sub> |
| Ile                | 90                 | 70 <sub>T</sub> |
| Leu                | 90                 | 73 <sub>T</sub> |
| Val                | 56                 | 53              |
| Phe                | 88                 | 70 <sub>T</sub> |
| Try                | 60                 | 60              |
| Tyr                | 48                 | 48              |
| Asp                | 83                 | 66 <sub>T</sub> |
| Glu                | 95                 | 63 <sub>T</sub> |
| Arg                | 83                 | 75 <sub>T</sub> |
| His                | 85                 | 78 <sub>T</sub> |
| Lys                | 80                 | 70 <sub>T</sub> |
| Ser                | 78                 | 78              |
| Thr                | 67                 | 65 <sub>T</sub> |
| Met                | 73                 | 70 <sub>T</sub> |
| Cys                | 95                 | 78 <sub>T</sub> |
| (Cys) <sub>2</sub> | 95                 | 80 <sub>T</sub> |
| Asn                | 78                 | 76              |
| Gln                | 74                 | 70 <sub>T</sub> |

Each value is an average of four replicates. \*T = Tailed spot.
